# Supplementary material for: Adsorption enhancement of methylene blue dye at kaolinite clay–water interface influenced by electrolyte solutions
Source: Royal Society of Chemistry journal article supplement (doi:10.1039/c5ra03534a), 2015-01-01
Supplement: c5ra03534a1.pdf [file c5ra03534a1.pdf]

Supplementary Data

**Adsorption Enhancement of Methylene Blue Dye at Kaolinite Clay – Water Interface  
Influenced by Electrolyte Solutions**

Khushi Mukherjee, Ankit Kedia, K. Jagajjani Rao, Satarupa Dhir, Santanu Paria\*

Interfaces and Nanomaterials Laboratory, Department of Chemical Engineering, National  
Institute of Technology, Rourkela 769008, Orissa, India.

\* To whom correspondence should be addressed. E-mail: santanuparia@yahoo.com, or  
sparia@nitrkl.ac.in; Fax: +91 661 246 2999

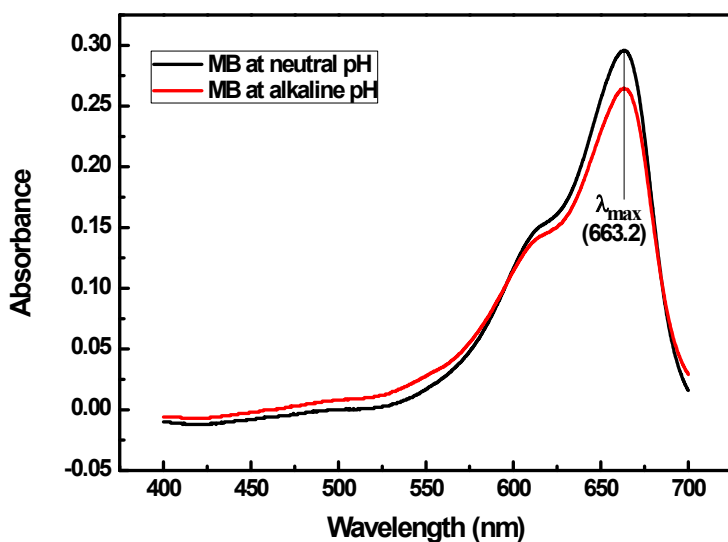

**Figure 1. UV spectra of MB at neutral and alkaline pH (11).**

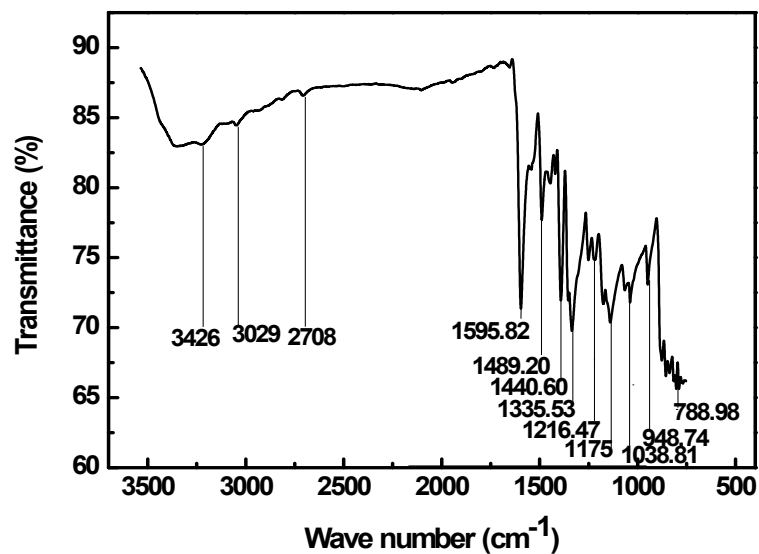

Fig S2. FTIR spectra of pure methylene blue.

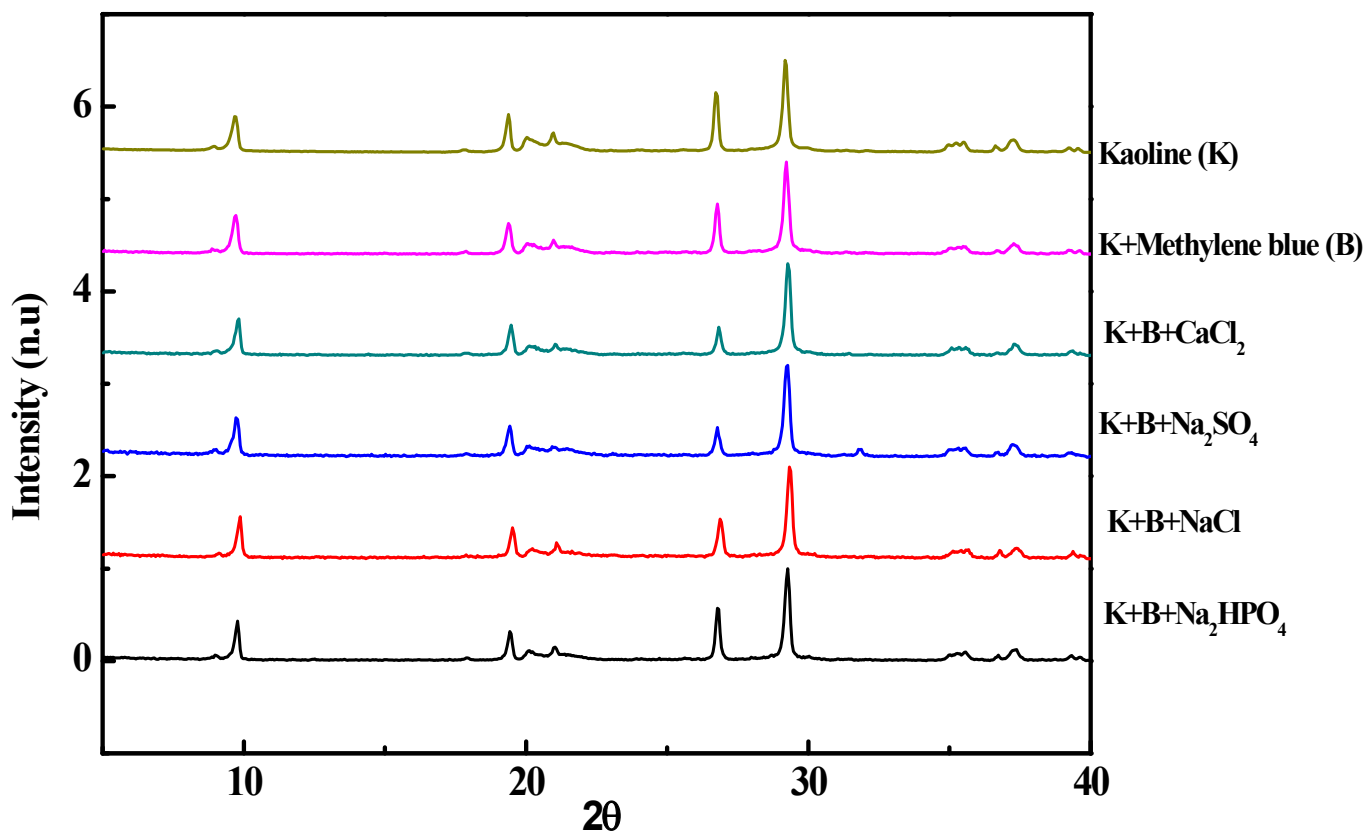

Fig. S3. XRD pattern of pure kaolinite clay and in presence of methylene blue and different electrolytes

**Table S1. X-ray data for kaolinite (K), K+methylene blue (MB), K+MB+electrolyte complexes**

| <b>Adsorbent</b>                      | <b>d-spacing (Å°)</b> |
|---------------------------------------|-----------------------|
| K                                     | 3.056                 |
| K+MB                                  | 3.054                 |
| K+MB+CaCl <sub>2</sub>                | 3.047                 |
| K+MB+Na <sub>2</sub> SO <sub>4</sub>  | 3.041                 |
| K+MB+NaCl                             | 3.051                 |
| K+MB+Na <sub>2</sub> HPO <sub>4</sub> | 3.049                 |
